# Supplementary material
Source: MDPI journal article supplement (https://www.mdpi.com/2076-3417/14/1/269)
Supplement: s1 [file s1]

**Table S1.** Descriptive analysis and comparison between the context according to the FC

| Variables                   |                        | FC1.0     |        |           |        |        |    |        |       |
|-----------------------------|------------------------|-----------|--------|-----------|--------|--------|----|--------|-------|
|                             |                        | Training  |        | Match     |        | t      | df | p      | d     |
|                             |                        | $\bar{X}$ | SD     | $\bar{X}$ | SD     |        |    |        |       |
| Kinematics External Load    | Distance/min           | 43,700    | 12,607 | 90,685    | 32,099 | -4,394 | 24 | 0,000* | 1,771 |
|                             | Explosive distance/min | 2,744     | 1,056  | 5,201     | 1,755  | -3,982 | 24 | 0,001* | 1,605 |
|                             | Accelerations/min      | 19,661    | 4,197  | 73,832    | 32,754 | -5,164 | 24 | 0,000* | 2,082 |
|                             | Desaccelerations/min   | 19,689    | 4,178  | 74,456    | 33,544 | -5,100 | 24 | 0,000* | 2,056 |
|                             | High Speed Running/min | 2,985     | 3,061  | 0,000     | 0,000  | 3,951  | 24 | 0,001* | 1,593 |
|                             | Maximum acceleration   | 3,134     | 0,418  | 3,203     | 0,918  | -0,221 | 24 | 0,827  | 0,089 |
|                             | Maximum deceleration   | -3,614    | 0,408  | -3,519    | 0,514  | -0,492 | 24 | 0,627  | 0,198 |
|                             | Average speed          | 5,152     | 0,153  | 3,996     | 1,208  | 2,988  | 24 | 0,006* | 1,205 |
|                             | Maximum speed          | 13,718    | 0,331  | 12,103    | 3,215  | 1,571  | 24 | 0,129  | 0,633 |
| Neuromuscular External Load | PlayerLoad/min         | 0,628     | 0,181  | 1,279     | 0,448  | -4,355 | 24 | 0,000* | 1,755 |
|                             | Impacts/min            | 45,705    | 31,128 | 114,265   | 73,323 | -2,787 | 24 | 0,010* | 1,124 |
| Objective Internal Load     | Average HR             | 122,188   | 23,384 | 137,400   | 18,602 | -1,738 | 24 | 0,095  | 0,701 |
|                             | Maximum HR             | 146,000   | 31,619 | 163,000   | 16,560 | -1,563 | 24 | 0,131  | 0,630 |
|                             | % maximum HR           | 69,650    | 14,471 | 74,820    | 9,102  | -1,008 | 24 | 0,324  | 0,406 |

$\bar{X}$ : Mean, SD: standard deviation; \*  $p < 0.05$ ; ES: effect size; Acc: acceleration; Dcc: deceleration; HSR: high-speed running; HR: heart rate; PL: player load.

**Table S2.** Descriptive analysis and comparison between the context according to the FC

| Variables                |                        | FC2.0     |       |           |        |        |    |        |       |
|--------------------------|------------------------|-----------|-------|-----------|--------|--------|----|--------|-------|
|                          |                        | Training  |       | Match     |        | t      | df | p      | d     |
|                          |                        | $\bar{X}$ | SD    | $\bar{X}$ | SD     |        |    |        |       |
| Kinematics External Load | Distance/min           | 55,272    | 4,139 | 79,695    | 56,271 | -1,224 | 14 | 0,241  | 0,612 |
|                          | Explosive distance/min | 4,251     | 0,743 | 5,926     | 4,804  | -0,975 | 14 | 0,346  | 0,488 |
|                          | Accelerations/min      | 22,951    | 4,692 | 69,576    | 21,304 | -6,045 | 14 | 0,000* | 3,023 |
|                          | Desaccelerations/min   | 14,854    | 7,830 | 69,714    | 21,568 | -6,762 | 14 | 0,000* | 3,381 |
|                          | High Speed Running/min | 0,000     | 0,000 | 0,000     | 0,000  |        |    |        |       |
|                          | Maximum acceleration   | 4,858     | 2,607 | 3,034     | 0,944  | 1,860  | 14 | 0,084  | 0,930 |
|                          | Maximum deceleration   | -4,830    | 2,739 | -3,088    | 0,711  | -1,742 | 14 | 0,103  | 0,871 |
|                          | Average speed          | 4,543     | 1,261 | 3,483     | 1,502  | 1,529  | 14 | 0,149  | 0,764 |

|                                |                |         |        |         |         |        |    |       |       |
|--------------------------------|----------------|---------|--------|---------|---------|--------|----|-------|-------|
|                                | Maximum speed  | 16,383  | 6,937  | 10,446  | 4,685   | 2,006  | 14 | 0,065 | 1,003 |
| Neuromuscular<br>External Load | PlayerLoad/min | 0,722   | 0,089  | 1,659   | 1,623   | -1,631 | 14 | 0,125 | 0,815 |
|                                | Impacts/min    | 105,366 | 64,177 | 180,600 | 167,272 | -1,188 | 14 | 0,255 | 0,594 |
| Objective Internal<br>Load     | Average HR     | 117,125 | 19,766 | 130,250 | 5,312   | -1,814 | 14 | 0,091 | 0,907 |
|                                | Maximum HR     | 151,250 | 26,677 | 161,750 | 3,732   | -1,103 | 14 | 0,289 | 0,551 |
|                                | % maximum HR   | 67,838  | 11,194 | 68,475  | 5,409   | -0,145 | 14 | 0,887 | 0,073 |

$\bar{X}$ : Mean, SD: standard deviation; \*  $p < 0.05$ ; ES: effect size; Acc: acceleration; Dcc: deceleration; HSR: high-speed running; HR: heart rate; PL: player load.

**Table S3.** Descriptive analysis and comparison between the context according to the FC

| Variables                      |                        | FC2.5     |        |           |         |        |    |        |       |
|--------------------------------|------------------------|-----------|--------|-----------|---------|--------|----|--------|-------|
|                                |                        | Training  |        | Match     |         | t      | df | p      | d     |
|                                |                        | $\bar{X}$ | SD     | $\bar{X}$ | SD      |        |    |        |       |
| Kinematics External<br>Load    | Distance/min           | 67,806    | 11,729 | 104,393   | 44,107  | -4,535 | 62 | 0,000* | 1,134 |
|                                | Explosive distance/min | 5,947     | 1,833  | 9,927     | 5,133   | -4,131 | 62 | 0,000* | 1,033 |
|                                | Accelerations/min      | 27,196    | 3,404  | 81,018    | 37,729  | -8,037 | 62 | 0,000* | 2,009 |
|                                | Desaccelerations/min   | 20,717    | 3,284  | 81,472    | 38,098  | -8,988 | 62 | 0,000* | 2,247 |
|                                | High Speed Running/min | 6,723     | 4,492  | 3,785     | 8,126   | 1,790  | 62 | 0,078  | 0,448 |
|                                | Maximum acceleration   | 3,693     | 0,556  | 3,267     | 0,455   | 3,347  | 62 | 0,001* | 0,837 |
|                                | Maximum deceleration   | -3,578    | 0,565  | -3,630    | 0,665   | 0,334  | 62 | 0,739  | 0,084 |
|                                | Average speed          | 5,336     | 0,261  | 4,149     | 1,461   | 4,524  | 62 | 0,000* | 1,131 |
|                                | Maximum speed          | 15,582    | 1,036  | 13,013    | 4,081   | 3,452  | 62 | 0,001* | 0,863 |
| Neuromuscular<br>External Load | PlayerLoad/min         | 0,743     | 0,230  | 1,360     | 1,278   | -2,686 | 62 | 0,009* | 0,671 |
|                                | Impact/min             | 179,488   | 61,678 | 266,190   | 204,557 | -2,296 | 62 | 0,025* | 0,574 |
| Objective Internal<br>Load     | Average HR             | 117,677   | 24,168 | 139,500   | 16,024  | -4,237 | 62 | 0,000* | 1,068 |
|                                | Maximum HR             | 153,452   | 31,592 | 167,750   | 11,943  | -2,390 | 62 | 0,020* | 0,602 |
|                                | % maximum HR           | 68,700    | 11,644 | 72,175    | 8,642   | -1,348 | 62 | 0,183  | 0,340 |

$\bar{X}$ : Mean, SD: standard deviation; \*  $p < 0.05$ ; ES: effect size; Acc: acceleration; Dcc: deceleration; HSR: high-speed running; HR: heart rate; PL: player load.

**Table S4.** Descriptive analysis and comparison between the context according to the FC

| Variables                   |                        | FC3.0     |        |           |        |        |    |       |       |
|-----------------------------|------------------------|-----------|--------|-----------|--------|--------|----|-------|-------|
|                             |                        | Training  |        | Match     |        | t      | df | p     | d     |
|                             |                        | $\bar{X}$ | SD     | $\bar{X}$ | SD     |        |    |       |       |
| Kinematics External<br>Load | Distance/min           | 63,315    | 12,491 | 75,818    | 44,477 | -1,083 | 30 | 0,288 | 0,383 |
|                             | Explosive distance/min | 4,360     | 0,922  | 6,290     | 4,681  | -1,618 | 30 | 0,116 | 0,572 |

|                             |                        |         |        |         |         |        |    |        |       |
|-----------------------------|------------------------|---------|--------|---------|---------|--------|----|--------|-------|
|                             | Accelerations/min      | 26,283  | 5,044  | 79,555  | 35,541  | -5,936 | 30 | 0,000* | 2,099 |
|                             | Desaccelerations/min   | 19,938  | 3,202  | 80,132  | 35,725  | -6,713 | 30 | 0,000* | 2,373 |
|                             | High Speed Running/min | 7,644   | 5,389  | 0,000   | 0,000   | 5,674  | 30 | 0,000* | 2,006 |
|                             | Maximum acceleration   | 3,383   | 0,607  | 3,041   | 0,710   | 1,461  | 30 | 0,155  | 0,516 |
|                             | Maximum deceleration   | -3,465  | 0,476  | -3,275  | 0,763   | -0,845 | 30 | 0,405  | 0,299 |
|                             | Average speed          | 5,341   | 0,200  | 3,532   | 1,690   | 4,253  | 30 | 0,000* | 1,504 |
|                             | Maximum speed          | 14,901  | 0,593  | 10,848  | 5,366   | 3,003  | 30 | 0,005* | 1,062 |
| Neuromuscular External Load | PlayerLoad/min         | 0,658   | 0,074  | 1,257   | 0,545   | -4,359 | 30 | 0,000* | 1,541 |
|                             | Impact/min             | 153,466 | 25,729 | 181,715 | 147,544 | -0,754 | 30 | 0,456  | 0,267 |
| Objective Internal Load     | Average HR             | 112,563 | 24,484 | 145,000 | 11,124  | -4,825 | 30 | 0,000* | 1,706 |
|                             | Maximum HR             | 146,375 | 33,850 | 176,500 | 10,671  | -3,395 | 30 | 0,002* | 1,200 |
|                             | % maximum HR           | 63,138  | 13,500 | 74,350  | 5,894   | -3,045 | 30 | 0,005* | 1,076 |

$\bar{X}$ : Mean, SD: standard deviation; \*  $p < 0.05$ ; ES: effect size; Acc: acceleration; Dcc: deceleration; HSR: high-speed running; HR: heart rate; PL: player load.

**Table S5.** Descriptive analysis and comparison between the context according to the FC

| Variables                   |                        | FC4.0     |        |           |         |        |    |        |       |
|-----------------------------|------------------------|-----------|--------|-----------|---------|--------|----|--------|-------|
|                             |                        | Training  |        | Match     |         | t      | df | p      | d     |
|                             |                        | $\bar{X}$ | SD     | $\bar{X}$ | SD      |        |    |        |       |
| Kinematics External Load    | Distance/min           | 67,572    | 13,075 | 105,180   | 41,431  | -4,698 | 52 | 0,000* | 1,286 |
|                             | Explosive distance/min | 6,483     | 1,861  | 9,701     | 4,491   | -3,566 | 52 | 0,001* | 0,977 |
|                             | Accelerations/min      | 28,344    | 3,768  | 67,930    | 27,308  | -7,865 | 52 | 0,000* | 2,154 |
|                             | Desaccelerations/min   | 28,383    | 3,782  | 68,270    | 27,742  | -7,803 | 52 | 0,000* | 2,137 |
|                             | High Speed Running/min | 6,172     | 5,039  | 0,000     | 0,000   | 5,989  | 52 | 0,000* | 1,640 |
|                             | Maximum acceleration   | 3,638     | 0,529  | 3,132     | 0,467   | 3,679  | 52 | 0,001* | 1,008 |
|                             | Maximum deceleration   | -4,058    | 0,483  | -3,620    | 0,581   | -3,029 | 52 | 0,004* | 0,830 |
|                             | Average speed          | 5,292     | 0,288  | 4,365     | 1,270   | 3,885  | 52 | 0,000* | 1,064 |
|                             | Maximum speed          | 15,264    | 0,967  | 13,791    | 3,777   | 2,057  | 52 | 0,045* | 0,563 |
| Neuromuscular External Load | PlayerLoad/min         | 0,803     | 0,257  | 1,868     | 1,250   | -4,558 | 52 | 0,000* | 1,248 |
|                             | Impact/min             | 182,725   | 66,645 | 324,159   | 163,726 | -4,314 | 52 | 0,000* | 1,181 |
| Objective Internal Load     | Average HR             | 121,600   | 29,008 | 123,167   | 24,650  | -0,211 | 52 | 0,834  | 0,058 |
|                             | Maximum HR             | 143,867   | 35,025 | 159,292   | 28,024  | -1,754 | 52 | 0,085  | 0,480 |
|                             | % maximum HR           | 62,533    | 15,713 | 71,025    | 13,246  | -2,113 | 52 | 0,039* | 0,579 |

---

$\bar{X}$ : Mean, SD: standard deviation; \*  $p < 0.05$ ; ES: effect size; Acc: acceleration; Dcc: deceleration; HSR: 1  
high-speed running; HR: heart rate; PL: player load. 2

3
